# Supplementary material for: Urinary Metabolomics in Pediatric Obesity and NAFLD Identifies Metabolic Pathways/Metabolites Related to Dietary Habits and Gut-Liver Axis Perturbations
Source: PubMed Central journal article supplement (PMC5452215; doi:10.3390/nu9050485), 2017-05-11
Supplement: nutrients-09-00485-s001.pdf [file nutrients-09-00485-s001.pdf]

## Supplementary

### Figure S1

*Metabolic systems map summarizing the shortest route that may explain the interactions among the 27 selected metabolites.*

There is a clear interplay of several pathways involving: Androgen and estrogen biosynthesis and metabolism; Biopterin metabolism; Butanoate metabolism; C21-steroid hormone biosynthesis and metabolism; Fructose and mannose metabolism; Galactose metabolism; Glycine, serine, alanine and threonine metabolism; Methionine and cysteine metabolism; Pentose phosphate pathway; Tryptophan metabolism; Tyrosine metabolism; Urea cycle and metabolism of arginine, proline, glutamate, aspartate and asparagine; Valine, leucine and isoleucine degradation; Vitamin B3 (nicotinate and nicotinamide) metabolism; Vitamin B5 - CoA biosynthesis from pantothenate.

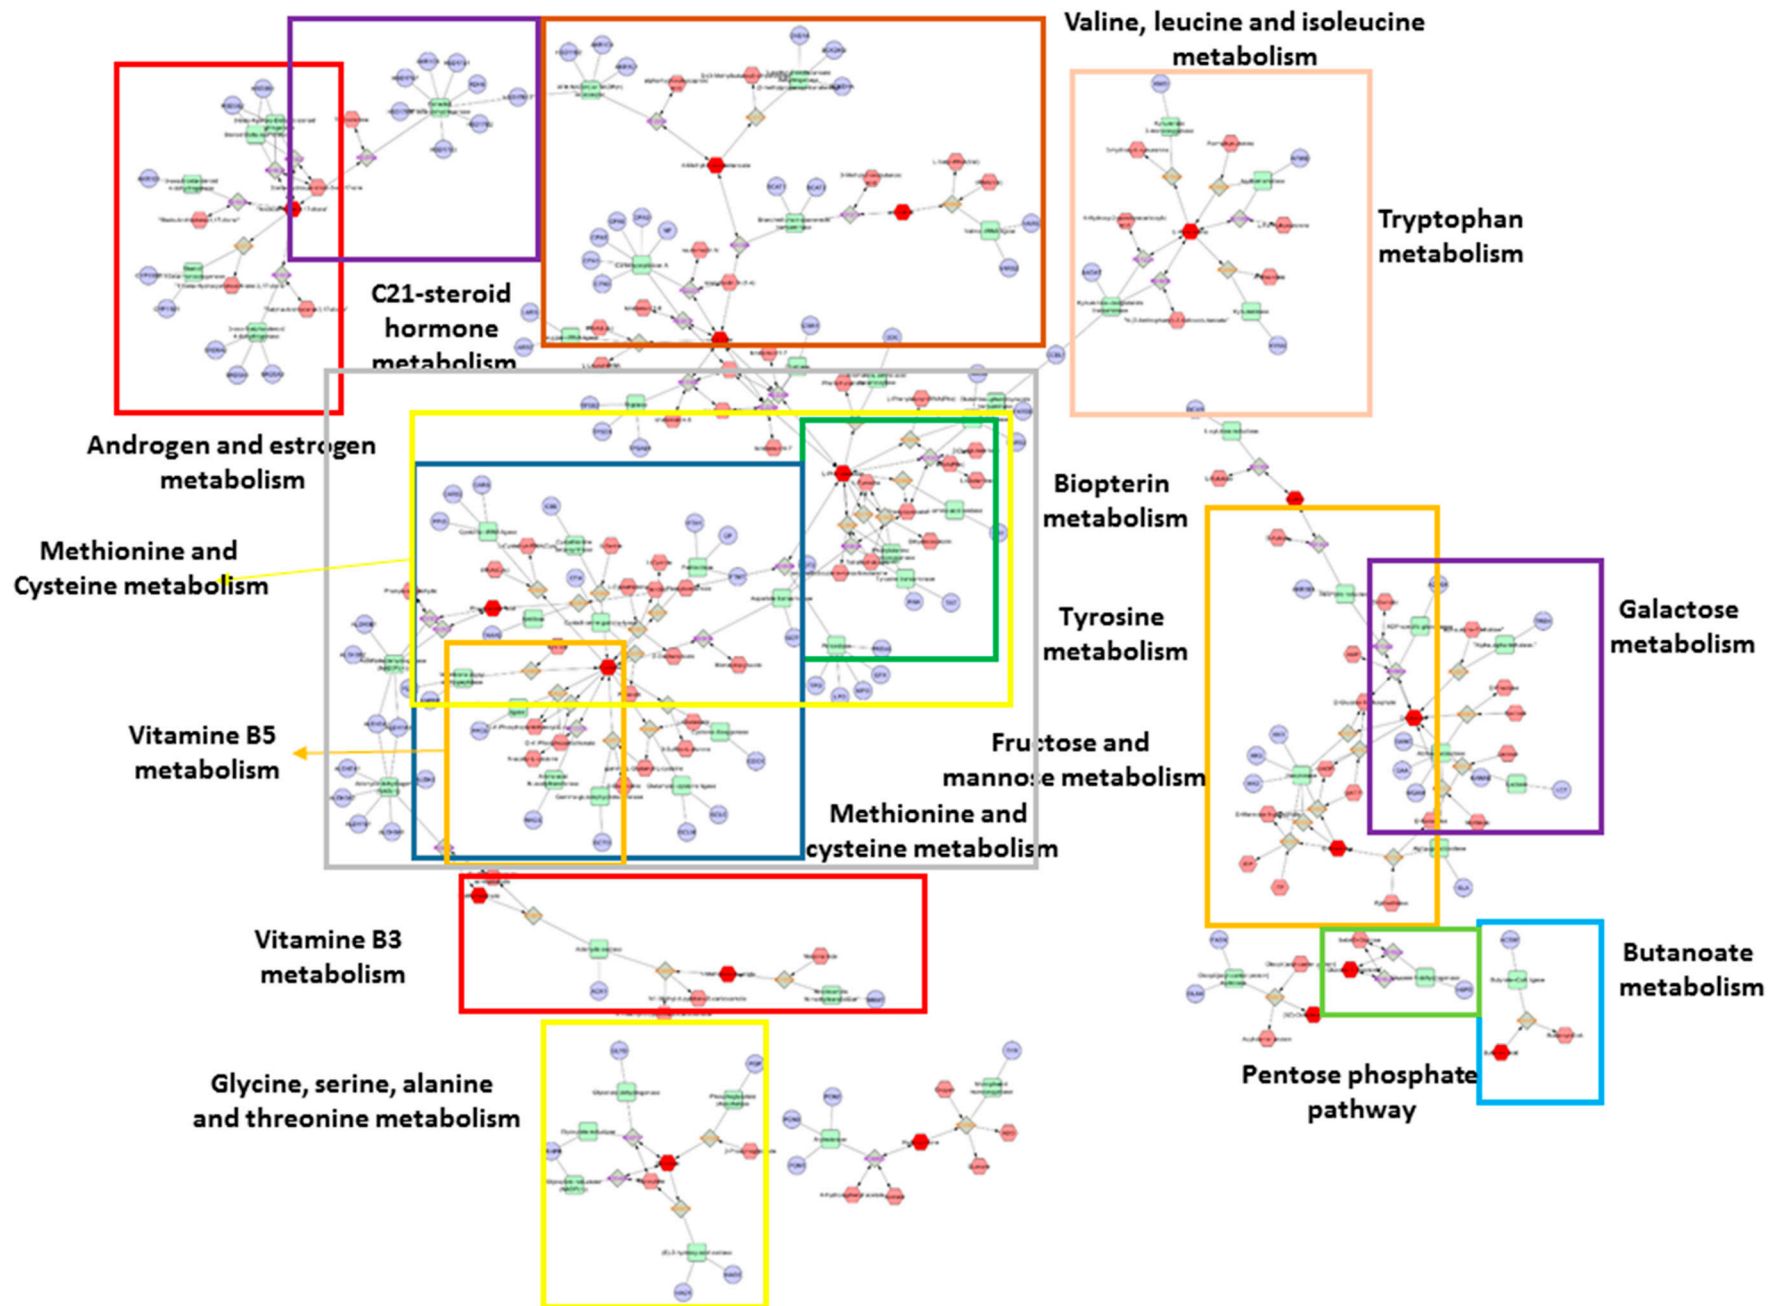

**Table S1.** Daily dietary nutrients assessment through 24 hrs recall

|                     |                 | NW           | OB[NAFLD-]   | OB[NAFLD+]    |
|---------------------|-----------------|--------------|--------------|---------------|
| Energy intake       | <i>Kcal/die</i> | 1330,3±314,4 | 1568,4±295,6 | 1739,6±505,4* |
| Total carbohydrates | <i>g/die</i>    | 180,8±52,8   | 184,8±63,4   | 177,3±67,7    |
|                     | <i>%</i>        | 50,6±8,2     | 43,8±7,1*    | 38,3±7,8*     |
| Simple Sugars       | <i>g/die</i>    | 21,2±4,2     | 43,3±27,3    | 41,2±17,7     |
|                     | <i>%</i>        | 6,4±1,1      | 10,3±5,9     | 9,0±3,3       |
| Total fats          | <i>g/die</i>    | 50,1±17,3    | 70,7±12,8*   | 83,3±21,4*    |
|                     | <i>%</i>        | 33,2±9,2     | 41,0±6,3*    | 43,7±6,0*     |
| Saturated fats      | <i>g/die</i>    | 8,9±5,8      | 17,7±7,3     | 18,4±6,4*     |
|                     | <i>%</i>        | 11,7±6,0     | 10,3±3,7     | 9,9±3,2       |
| Total fibers        | <i>d/die</i>    | 9,0±4,1      | 10,8±3,2     | 11,3±5,4      |
| Total proteins      | <i>g/die</i>    | 50,7±13,3    | 57,8±11,3    | 78,4±35,8*    |
|                     | <i>%</i>        | 15,0±3,6     | 15,3±4,2     | 18,1±4,7      |
| Cholesterol         | <i>mg/die</i>   | 152,9±124,9  | 159,8±82,6   | 267,0±186,6   |
| Sodium              | <i>mg/die</i>   | 726,3±505,2  | 1452,7±746,3 | 1781,1±955,7  |
| Fructose            | <i>mg/die</i>   | 6,9±4,2      | 9,9±4,7      | 19,7±17,0*§   |

**Abbreviations:** (NAFLD) non alcoholic fatty liver disease; (NW), normal weight/controls; (OB[NAFLD-]) obese without NAFLD; (OB[NAFLD+]) obese with NAFLD

**Statistics:** Values are expressed as means ± 1 standard deviation. \* asterisk indicates a statistically significant difference (p<0.05) from the Control group (NW),

§ symbol indicates a statistically significant difference (p<0.05) from the obese without NAFLD (OB[NAFLD-]).
